# Supplementary material for: Phycocyanin ameliorates mouse colitisviaphycocyanobilin-dependent antioxidant and anti-inflammatory protection of the intestinal epithelial barrier
Source: Royal Society of Chemistry journal article supplement (doi:10.1039/d1fo02970c), 2022-01-01

**Phycocyanin Ameliorates Mouse Colitis via Phycocyanobilin-Dependent  
Antioxidant and Anti-Inflammatory Protection of Intestinal Epithelial Barrier**

Wei Guo,<sup>a, b</sup> Mingyong Zeng,<sup>b</sup> Suqin Zhu,<sup>c</sup> Shiyang Li,<sup>b</sup> Yilin Qian,<sup>b</sup> and Haohao  
Wu<sup>\*b</sup>

<sup>a</sup> School of Pharmacy, Binzhou Medical University, 346 Guanhai Road, Yantai,  
Shandong, 264003, China

<sup>b</sup> College of Food Science and Engineering, Ocean University of China, 5 Yushan  
Road, Qingdao, Shandong Province, 266003, China

<sup>c</sup> Institute of Nutrition and Health, School of Public Health, Qingdao University,  
Qingdao 266021, China

\* The author to whom correspondence should be addressed; E-mail:

[wuhaohao@ouc.edu.cn](mailto:wuhaohao@ouc.edu.cn); Tel. & Fax: +86-532-8203-2400.

**Table S1** The criteria for DAI

| Score | Trait of stool | Rectal bleeding  | Weight loss |
|-------|----------------|------------------|-------------|
| 0     | Normal stools  | Negative         | None        |
| 1     | Soft stools    | Negative         | 1-5%        |
| 2     | Soft stools    | Positive         | 6-10%       |
| 3     | Very soft      | Visible in stool | 11-15%      |
| 4     | Watery stool   | Gross bleeding   | > 15%       |

Figure S1 (a) Primary mass spectra of PCB (3Z); (e) secondary mass spectra of PCB (3Z).

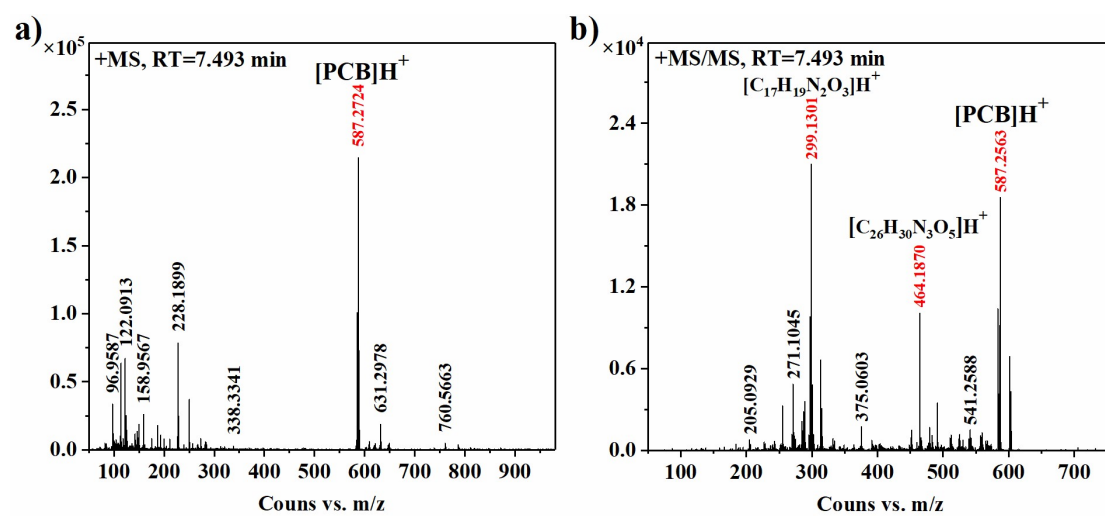

Supplement: d1fo02970c1.pdf [file d1fo02970c1.pdf]
